# Supplementary material for: Selective stalling of human translation through small-molecule engagement of the ribosome nascent chain
Source: PLoS Biol. 2017 Mar 21;15(3):e2001882. doi: 10.1371/journal.pbio.2001882 (PMC5360235; doi:10.1371/journal.pbio.2001882)
Supplement: S14 Table — (XLSX) [file pbio.2001882.s029.xlsx]

## Sheet: Fig. 1B
Raw luciferase units
Treatment	50 µM PF-06446846	50 µM PF-06446846	50 µM PF-06446846	Vehicle	Vehicle	Vehicle
Replicate	1	2	3	1	2	3
Construct
PCSK9-luciferase	11947	10327	10301	38344	38744	42301
PCSK9(1-35)-luciferase	87744	90393	96576	283967	316212	348705
PCSK9(1-33)-luciferase	138488	132430	142781	330143	331287	341714
Luciferase	8260494	7302476	7768499	12462317	9168532	8247544

## Sheet: Fig. 1C
	Raw Luminescence observations
	Treatment	50 uM PF-06446846	50 uM PF-06446846	50 uM PF-06446846	Vehicle	Vehicle rep 2	Vehicle rep 3
Construct	Replicate	1	2	3	1	2	3
	Luciferase	1910353	2455014	2551180	3762459	4153642	4931799
	PCSK9(1-33)	6667	6930	7200	64507	62372	67688
	Common codons	6149	7268	6511	15465	18110	17546
	Rare codons	18844	17172	10573	152359	166100	165540
	double frameshift	119517	113619	104807	139314	151921	149187

## Sheet: Fig. 1D
Saturation binding
µM PF-06446846	fmol/mg
31.595	22135.4
28.9416	24534
26.9854	22674.5
25.6084	19560.8
22.5521	25881.7
20.4247	21743.6
16.7894	22347.1
16.7641	18916.9
15.846	20230.9
12.4244	15906.5
11.0278	19020.9
9.94299	16143.1
6.18235	11470.5
5.48885	13281.9
5.02476	11428
4.22787	10773.8
4.08263	10710.3
3.52507	10067.5
3.10059	7931.06
3.02472	7521.31
2.52049	8161.67
1.34756	5370.96
1.15458	4535.93
0.872716	4958.75
0.661094	2870.48
0.526994	3073.59
0.48881	2507.28
0.246593	1907.48
0.246352	1767.54
0.187695	1613.17
0.176009	1113.56
0.134868	894.389
0.110465	967.356
0.076545	384.71
0.061963	465.3
0.053885	426.366
0	-45.1959
0	-34.0331
0	-46.0127

## Sheet: Fig 2A
PLASMA [PCSK9] ELISA measurements after a single dose
Rat	1	2	3	4	5	6	7	8	9	10	11	12	13	14	15	16	17	18	19	20
PF-06449846 dose	Vehicle	Vehicle	Vehicle	Vehicle	Vehicle	5 mg/kg	5 mg/kg	5 mg/kg	5 mg/kg	5 mg/kg	15 mg/kg	15 mg/kg	15 mg/kg	15 mg/kg	15 mg/kg	50 mg/kg	50 mg/kg	50 mg/kg	50 mg/kg	50 mg/kg
Time post-dose
1 hr	447.216	405.535	307.824	409.634	488.896	457.465	360.437	313.973	296.891	365.904	392.552	510.079	316.707	361.121	377.52	304.407	414.417	604.373	225.145	229.928
3 hr	357.704	370.003	325.589	391.186	502.562	488.896	341.305	305.091	292.791	390.502	396.652	439.699	291.425	253.16	305.091	219.679	323.539	450.632	214.213	240.178
6 hr	467.031	331.739	279.125	270.243	521.011	434.233	281.175	266.143	253.844	345.405	298.941	313.29	182.781	171.848	265.46	126.068	195.08	293.475	105.569	146.566
24 hr	622.822	499.146	430.133	444.482	580.458	522.378	368.637	368.637	331.056	378.886	611.206	437.649	383.669	302.357	298.941	197.813	354.288	457.465	352.921	213.529

## Sheet: Fig. 2B
PLASMA [PCSK9] ELISA measurements after repeated dosing
Rat	1	2	3	4	5	6	7	8	9	10	11	12	13	14	15	16	17	18	19	20
PF-06449846 dose	Vehicle	Vehicle	Vehicle	Vehicle	Vehicle	5 mg/kg	5 mg/kg	5 mg/kg	5 mg/kg	5 mg/kg	15 mg/kg	15 mg/kg	15 mg/kg	15 mg/kg	15 mg/kg	50 mg/kg	50 mg/kg	50 mg/kg	50 mg/kg	50 mg/kg
Time post-dose
1 hr	474.127	269.312	308.647	299.83	361.546	331.706	333.062	224.551	318.142	345.27	417.158	314.073	297.796	286.945	301.865	116.039	139.098	282.876	198.101	93.6589
3 hr	522.279	320.176	259.817	251	383.249	369.006	360.868	241.506	328.315	292.37	336.453	301.865	279.485	212.343	228.62	112.648	121.465	233.367	149.949	73.9912
6 hr	367.65	282.197	276.094	205.561	293.048	314.751	276.094	187.25	250.322	269.99	269.99	199.457	190.641	149.271	164.869	66.531	63.14	191.997	88.2333	51.6107
24 hr	424.619	322.211	276.094	265.921	450.39	476.161	299.83	425.297	305.256	330.349	459.885	282.197	379.858	274.059	297.118	155.375	129.603	328.993	226.585	109.257

## Sheet: Fig. 2C
Total Cholesterol measurments (mg/dL)
	Treatment group
Individual	Vehicle	5 mg/kg	15 mg/kg	50 mg/kg
1	49	49	50	37
2	57	60	49	38
3	48	57	52	53
4	45	50	41	27
5	58	57	61	26

## Sheet: Fig. 2D
LDL Cholesterol measurments (mg/dL)
	Treatment group
Individual	Vehicle	5 mg/kg	15 mg/kg	50 mg/kg
1	4	5	4	2
2	5	6	3	2
3	5	6	4	3
4	5	6	3	2
5	5	4	4	1

## Sheet: Fig. 2E
HDL Cholesterol measurments (mg/dL)
	Treatment group
Individual	Vehicle	5 mg/kg	15 mg/kg	50 mg/kg
1	44	36	47	37
2	49	51	47	37
3	43	46	48	51
4	38	43	40	28
5	54	52	58	25

## Sheet: Fig. 4E
	Reads mapping 3' to stall site
	Treatment	1.5 µM PF-06446846	1.5 µM PF-06446846	1.5 µM PF-06446846	0.3 µM PF-06446846	0.3 µM PF-06446846	0.3 µM PF-06446846	Vehicle	Vehicle	Vehicle
	replicate	1	2	3	1	2	3	1	2	3
	Treatment time
	10 min	19.5253	17.0218	12.6792	41.0434	26.9239	24.8139	69.5956	66.6448	40.2882
	60 min.	9.53551	16.0366	11.4839	29.7421	40.7083	24.1633	42.8026	67.8526	42.9909
	ELISA data (ELISA datas for Fig 4E is taken from Fig S8C)
	Reads mapping 3' to stall site
	Treatment	1.5 µM PF-06446846	1.5 µM PF-06446846	1.5 µM PF-06446846	0.3 µM PF-06446846	0.3 µM PF-06446846	0.3 µM PF-06446846	Vehicle	Vehicle	Vehicle
	replicate	1	2	3	1	2	3	1	2	3
	Absorbance	0.0896	0.101	0.0972	0.1941	0.188	0.1698	0.3746	0.241	0.3356
	ELISA Standard curve (ELISA data for Fig. 4E is taken from Fig S8C).
	Standard curve
	[PCSK9] (ng/mL)	Absorbance (450 nm)
	40	2.0287
	20	1.0762
	10	0.6565
	5	0.3219
	2.5	0.1803
	1.25	0.1019
	0.625	0.0721
	0	0.0282

## Sheet: Fig. 5J
Raw luciferase units
Treatment	50 µM PF-06446846	50 µM PF-06446846	50 µM PF-06446846	Vehicle	Vehicle	Vehicle
Replicate	1	2	3	1	2	3
Construct
PCSK9(1-35)-luciferase	5378	7088	4937	49667	50346	51591
luciferase	3229020	3757486	3996755	4756327	4753009	4829177
rpL27(1-32)-luciferase	957610	761302	1104519	5895545	6193012	6201604
HSD17B11(1-21)-luciferase	17438	19433	21271	214042	211131	212737
MDK(1-25)-luciferase	204466	200092	209412	362822	348038	374678
MST1(1-42)-luciferase	7211	7047	8515	188892	200354	213728
PCBP1(1-37)-luciferase	551815	527337	675737	2443293	2596485	2539696
LTBP3(1-40)-luciferase	114	90	113	560	584	644
CDH1(650-750)-luciferase	242724	184392	203527	896657	992611	1029936
BCAP31(1-30)-luciferase	3860	3181	3384	9134	9338	8915
PODXL2(1-36)-luciferase	2078	1244	1417	7522	7823	7802
SUMF1(1-36)-luciferase	8102	8789	6431	21601	21319	21106
EMC7(1-22)-luciferase	47968	58439	46936	91475	94257	85178

[truncated: 21 more sheets: Fig. 5K, Fig. 5L, Fig. 5M, Fig. S8A, Fig. S8C, Fig. S8D, Fig. S9A, Fig. S9B, Fig. S9C, Fig. S9D, Fig. S10B, Fig. S10C, Fig. S10D, Fig. S10E, Fig. S10F, Fig. S11A, Fig. S11B, Fig. S11C, Fig. S15A, Fig. S15B …]
